# Supplementary material for: Significantly enhanced photoluminescence and thermal stability of La3Si8N11O4:Ce3+,Tb3+via the Ce3+ → Tb3+ energy transfer: a blue-green phosphor for ultraviolet LEDs
Source: Royal Society of Chemistry journal article supplement (doi:10.1039/c8ra07011c), 2018-01-01
Supplement: c8ra07011c1.pdf [file c8ra07011c1.pdf]

### Supporting Information

Table S1 Ionic radii (Å) of La<sup>3+</sup>, Ce<sup>3+</sup>, Tb<sup>3+</sup> for the given coordination number (CN)

| Ions             | Ionic radii(Å) |      |
|------------------|----------------|------|
|                  | 6              | 8    |
| La <sup>3+</sup> | 1.03           | 1.16 |
| Ce <sup>3+</sup> | 1.01           | 1.14 |
| Tb <sup>3+</sup> | 0.92           | 1.04 |

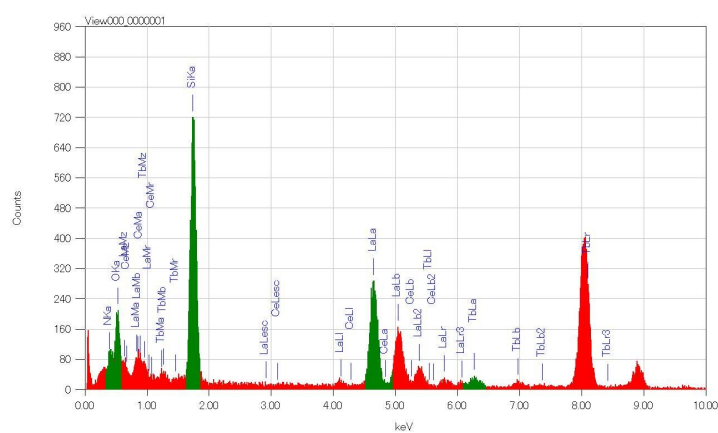

Fig. S1 EDS spectrum of La<sub>3</sub>Si<sub>8</sub>N<sub>11</sub>O<sub>4</sub>:0.01Ce,0.2Tb
